# Supplementary material for: A helicase-tethered ORC flip enables bidirectional helicase loading
Source: eLife journal article supplement (doi:10.7554/elife.74282), 2021-12-09
Supplement: supp [file elife-74282-supp-v1.zip]

Archive with 28 entries (28 files):
- elife_poa_e74282_Figure_1_figure_supplement_1.ai
- elife_poa_e74282_Figure_1_figure_supplement_2.ai
- elife_poa_e74282_Figure_1_figure_supplement_3.ai
- elife_poa_e74282_Figure_1_figure_supplement_4.ai
- elife_poa_e74282_Figure_2_figure_supplement_1.ai
- elife_poa_e74282_Figure_2_figure_supplement_2.ai
- elife_poa_e74282_Figure_3_figure_supplement_1.ai
- elife_poa_e74282_Figure_4_figure_supplement_1.ai
- elife_poa_e74282_Figure_4_figure_supplement_2.ai
- elife_poa_e74282_Figure_4_figure_supplement_3.ai
- elife_poa_e74282_Figure_4_figure_supplement_4.ai
- elife_poa_e74282_Figure_5_figure_supplement_1.ai
- elife_poa_e74282_Figure_5_figure_supplement_2.ai
- elife_poa_e74282_Figure_5_figure_supplement_3.ai
- elife_poa_e74282_Figure_6_figure_supplement_1.ai
- elife_poa_e74282_Figure_6_figure_supplement_2.ai
- elife_poa_e74282_Figure_6_figure_supplement_3.ai
- elife_poa_e74282_Figure_6_figure_supplement_4.ai
- elife_poa_e74282_Figure_7_figure_supplement_1.ai
- elife_poa_e74282_Transparent_Reporting_File.pdf
- elife_poa_e74282_Figure_1_source_data_1.xlsx
- elife_poa_e74282_Figure_2_source_data_1.xlsx
- elife_poa_e74282_Figure_2_figure_supplement_1_source_data_1.xlsx
- elife_poa_e74282_Figure_3_source_data_1.xlsx
- elife_poa_e74282_Figure_4_Source_data_1.xlsx
- elife_poa_e74282_Figure_5_source_data_1.xlsx
- elife_poa_e74282_Figure_5_figure_supplement_1_source_data_1.xlsx
- elife_poa_e74282_Figure_6_source_data_1.xlsx
