# Supplementary material for: A helicase-tethered ORC flip enables bidirectional helicase loading
Source: eLife journal article supplement (doi:10.7554/elife.74282), 2021-12-09
Supplement: supp [file elife-74282-supp-v1.zip › elife_poa_e74282_Figure_1_source_data_1.xlsx]

## Sheet: Fig1 (N = 106)
	AOI	First Mcm2-7 arrival (frames)	OM-FRET #1 start (frames)	OM-FRET #1 end (frames)	Second Mcm2-7 arrival (frames)	OM-FRET #2 start (frames)	OM-FRET #2 end (frames)	ORC departure (frames)	First Mcm2-7 arrival (time, s)	OM-FRET #1 start (time, s)	OM-FRET #1 end (time, s)	Second Mcm2-7 arrival (time, s)	OM-FRET #2 start (time, s)	OM-FRET #2 end (time, s)	ORC departure (time, s)	OM-FRET #1 start - first Mcm2-7 arrival	OM-FRET #1 end - first Mcm2-7 arrival	OM-FRET #2 start - second Mcm2-7 arrival	OM-FRET #2 end - second Mcm2-7 arrival	ORC departure - OM-FRET #2 end
072519_644	10	439	439	464	485	487	558	600	1053.8	1052.62	1112.64	1164.16	1167.83	1338.57	1439.32	-1.174	58.84	3.665	174.413	100.745
	22	471	471	484	496	496	523	526	1130.59	1129.39	1160.58	1190.68	1189.51	1254.51	1261.66	-1.194	29.998	-1.166	63.83	7.156
	24	91	92	117	131	132	141	141	217.652	218.861	279.122	313.916	315.165	336.782	336.782	1.209	61.47	1.249	22.866	0
	31	531	533	535	544	544	575	575	1274.9	1278.53	1283.34	1306.22	1305.05	1379.41	1379.41	3.633	8.437	-1.172	73.195	0
	32	261	262	265	371	373	397	398	626.19	627.402	634.597	890.706	894.373	951.941	954.3	1.212	8.407	3.667	61.235	2.359
	37	368	368	392	507	508	591	600	883.523	882.263	939.956	1217.12	1218.37	1417.73	1439.32	-1.26	56.433	1.246	200.603	21.591
	38	448	448	463	476	476	528	528	1075.45	1074.15	1110.21	1142.61	1141.39	1266.53	1266.53	-1.297	34.757	-1.219	123.919	0
	39	122	122	132	267	270	295	296	292.335	291.151	315.165	640.654	646.733	707.005	709.412	-1.184	22.83	6.079	66.351	2.407
	60	432	432	439	446	447	467	467	1037.01	1035.82	1052.62	1070.57	1071.77	1119.78	1119.78	-1.185	15.614	1.195	49.209	0
	63	388	388	391	440	441	461	461	931.515	930.343	937.551	1056.18	1057.41	1105.41	1105.41	-1.172	6.036	1.229	49.229	0
	67	51	51	79	96	96	100	101	121.439	120.253	187.482	229.742	228.521	238.156	240.523	-1.186	66.043	-1.221	8.414	2.367
	70	42	42	57	102	102	148	307	99.743	98.548	134.673	244.169	242.933	353.544	735.909	-1.195	34.93	-1.236	109.375	382.365
	93	111	111	121	153	153	168	168	265.818	264.585	288.79	366.76	365.537	401.535	401.535	-1.233	22.972	-1.223	34.775	0
	98	75	75	80	99	100	112	112	179.068	177.897	189.858	236.97	238.156	267.047	267.047	-1.171	10.79	1.186	30.077	0
	104	404	405	468	483	483	538	600	969.917	971.113	1122.23	1159.39	1158.19	1290.61	1439.32	1.196	152.314	-1.202	131.211	148.713
	110	283	283	300	328	328	332	346	679.274	678.101	719.071	787.484	786.25	795.87	829.36	-1.173	39.797	-1.234	8.386	33.49
	114	206	206	220	289	290	403	423	494.055	492.884	526.442	693.693	694.985	966.28	1014.26	-1.171	32.387	1.292	272.587	47.984
	120	310	310	318	339	339	349	349	744.25	743.05	762.25	813.857	812.662	836.564	836.564	-1.2	18	-1.195	22.707	0
	126	362	362	374	408	409	422	422	869.003	867.829	896.742	979.539	980.763	1011.89	1011.89	-1.174	27.739	1.224	32.352	0
	129	388	388	396	405	405	415	415	931.515	930.343	949.535	972.283	971.113	995.107	995.107	-1.172	18.02	-1.17	22.824	0
	137	288	289	315	401	401	415	415	691.335	692.522	755.113	962.681	961.498	995.107	995.107	1.187	63.778	-1.183	32.426	0
	138	270	271	283	299	299	312	312	647.942	649.133	678.101	717.876	716.66	747.92	747.92	1.191	30.159	-1.216	30.044	0
	142	258	258	267	317	318	336	336	618.971	617.79	639.447	761.057	762.25	805.439	805.439	-1.181	20.476	1.193	44.382	0
	144	192	193	197	243	243	250	250	460.489	461.698	471.323	582.802	581.592	598.558	598.558	1.209	10.834	-1.21	15.756	0
	157	36	36	61	108	108	144	144	85.38	84.211	144.252	258.627	257.454	343.934	343.934	-1.169	58.872	-1.173	85.307	0
	163	107	107	142	213	214	225	225	256.252	255.019	339.152	510.797	511.985	538.404	538.404	-1.233	82.9	1.188	27.607	0
	166	74	74	89	180	181	241	324	176.708	175.511	211.564	431.611	432.913	576.855	776.689	-1.197	34.856	1.302	145.244	199.834
	185	147	148	166	210	211	218	235	352.355	353.544	396.797	503.642	504.874	521.603	562.405	1.189	44.442	1.232	17.961	40.802
	187	28	28	36	47	48	63	76	66.148	64.97	84.211	111.75	112.943	149.098	180.273	-1.178	18.063	1.193	37.348	31.175
	200	505	505	520	566	567	584	585	1212.33	1211.14	1247.3	1358.92	1360.19	1400.96	1403.38	-1.188	34.969	1.274	42.039	2.42
	202	268	268	291	311	312	336	336	643.099	641.919	697.389	746.703	747.92	805.439	805.439	-1.18	54.29	1.217	58.736	0
	228	45	46	81	223	223	232	233	106.983	108.176	192.323	534.823	533.615	555.217	557.617	1.193	85.34	-1.208	20.394	2.4
	230	64	65	69	96	98	141	141	152.672	153.861	163.495	229.742	233.405	336.782	336.782	1.189	10.823	3.663	107.04	0
	232	176	177	184	229	230	258	258	421.961	423.216	440.053	549.188	550.39	617.79	617.79	1.255	18.092	1.202	68.602	0
	237	156	157	170	292	293	306	306	373.958	375.162	406.407	700.987	702.179	733.464	733.464	1.204	32.449	1.192	32.477	0
	238	145	145	161	190	190	214	288	347.581	346.39	384.787	455.684	454.5	511.985	690.12	-1.191	37.206	-1.184	56.301	178.135
	240	391	391	402	425	425	442	442	938.735	937.551	963.905	1020.25	1019	1059.78	1059.78	-1.184	25.17	-1.248	39.532	0
011320_1010	6	247	248	283	296	297	317	320	591.266	592.501	676.281	708.588	709.823	757.803	765.018	1.235	85.015	1.235	49.215	7.215
	21	180	181	195	221	221	257	273	430.615	431.89	465.528	529.07	527.884	613.927	652.278	1.275	34.913	-1.186	84.857	38.351
	67	229	229	234	241	241	254	254	548.222	546.997	559.12	576.924	575.756	606.812	606.812	-1.225	10.898	-1.168	29.888	0
	69	408	409	439	551	552	566	573	977.071	978.267	1050.41	1320.65	1321.9	1355.92	1373.02	1.196	73.337	1.25	35.276	17.091
	76	251	252	267	394	395	409	409	600.796	602.006	637.929	943.409	944.626	978.267	978.267	1.21	37.133	1.217	34.858	0
	77	384	384	387	413	414	424	425	919.349	918.176	925.383	989.158	990.382	1014.33	1016.76	-1.173	6.034	1.224	25.169	2.437
	105	214	215	227	255	256	271	272	512.235	513.475	542.237	610.362	611.575	647.54	649.908	1.24	30.002	1.213	37.178	2.368
	130	288	289	292	348	348	352	352	689.469	690.692	697.884	833.227	832.053	841.593	841.593	1.223	8.415	-1.174	8.366	0
	150	214	214	218	396	396	411	411	512.235	511.063	520.654	948.18	946.993	983.155	983.155	-1.172	8.419	-1.187	34.975	0
	152	172	172	185	192	192	233	233	411.515	410.336	441.459	459.464	458.264	556.683	556.683	-1.179	29.944	-1.2	97.219	0
	161	437	438	482	522	522	531	532	1046.79	1047.98	1153.81	1250.9	1249.73	1271.39	1273.77	1.194	107.023	-1.164	20.493	2.382
	200	527	527	536	580	580	587	587	1262.97	1261.8	1283.38	1391.08	1389.87	1406.74	1406.74	-1.164	20.417	-1.213	15.664	0
	210	108	108	111	115	116	121	121	257.756	256.568	263.819	274.58	275.795	287.743	287.743	-1.188	6.063	1.215	13.163	0
	215	225	225	250	293	293	298	298	538.67	537.501	597.271	701.425	700.261	712.23	712.23	-1.169	58.601	-1.164	10.805	0
	219	279	280	284	305	306	315	315	667.841	669.103	678.723	730.261	731.454	753.065	753.065	1.262	10.882	1.193	22.804	0
	228	254	254	264	305	306	323	357	608.012	606.812	630.714	730.261	731.454	772.207	853.513	-1.2	22.702	1.193	41.946	81.306
	241	144	145	159	404	406	418	418	344.145	345.351	379.121	967.507	971.108	999.923	999.923	1.206	34.976	3.601	32.416	0
	259	484	484	491	503	504	528	600	1159.78	1158.57	1175.44	1205.4	1206.59	1264.17	1438	-1.205	15.661	1.187	58.764	173.836
	283	120	121	124	231	231	271	271	286.545	287.743	295.011	553.053	551.868	647.54	647.54	1.198	8.466	-1.185	94.487	0
	293	212	212	222	227	228	250	250	507.499	506.305	530.26	543.409	544.605	597.271	597.271	-1.194	22.761	1.196	53.862	0
	314	74	74	88	97	97	103	103	176.274	175.082	208.641	231.436	230.264	244.622	244.622	-1.192	32.367	-1.172	13.186	0
	330	542	543	563	569	569	583	583	1298.93	1300.18	1348.63	1364.47	1363.27	1397.09	1397.09	1.25	49.696	-1.205	32.617	0
	332	297	298	310	318	319	334	334	711.038	712.23	741.089	761.408	762.648	798.453	798.453	1.192	30.051	1.24	37.045	0
	349	201	201	215	223	223	242	354	481.052	479.872	513.475	533.822	532.648	578.117	846.36	-1.18	32.423	-1.174	44.295	268.243
	350	489	490	504	519	519	534	535	1171.78	1173.01	1206.59	1243.78	1242.58	1278.57	1280.99	1.228	34.807	-1.196	34.796	2.42
	352	542	542	548	559	559	585	590	1298.93	1297.76	1312.22	1340.05	1338.86	1401.97	1414.04	-1.173	13.286	-1.184	61.921	12.07
	354	329	330	335	414	414	433	435	787.713	788.96	800.911	991.579	990.382	1035.96	1040.78	1.247	13.198	-1.197	44.384	4.814
	375	437	438	452	510	510	562	600	1046.79	1047.98	1081.8	1222.19	1220.98	1346.19	1438	1.194	35.011	-1.217	123.999	91.808
	376	220	220	230	347	347	367	370	526.69	525.519	549.477	830.85	829.623	877.356	884.562	-1.171	22.787	-1.227	46.506	7.206
	387	211	211	218	222	222	255	260	505.114	503.926	520.654	531.454	530.26	609.197	621.111	-1.188	15.54	-1.194	77.743	11.914
	428	209	210	221	231	231	301	304	500.252	501.474	527.884	553.053	551.868	719.478	726.668	1.222	27.632	-1.185	166.425	7.19
	434	81	82	90	170	171	201	248	193.048	194.265	213.495	406.669	407.934	479.872	592.501	1.217	20.447	1.265	73.203	112.629
	443	517	518	520	540	540	545	563	1238.92	1240.11	1244.97	1294.18	1292.99	1304.98	1348.63	1.192	6.046	-1.182	10.806	43.646
080420_1292	5	546	546	550	559	560	579	579	1313.83	1312.65	1322.3	1345.21	1346.41	1392.31	1392.31	-1.18	8.473	1.194	47.093	0
	41	525	526	543	580	581	587	600	1263.31	1264.52	1305.37	1395.87	1397.08	1411.49	1442.77	1.207	42.059	1.208	15.62	31.279
	53	512	512	517	538	540	571	571	1232.07	1230.87	1242.88	1294.52	1298.08	1373.01	1373.01	-1.194	10.819	3.564	78.493	0
	98	529	530	538	543	544	554	556	1272.91	1274.11	1293.32	1306.6	1307.79	1331.98	1336.79	1.197	20.415	1.189	25.379	4.81
	99	102	102	107	113	113	147	147	244.605	243.434	255.441	271.051	269.842	351.817	351.817	-1.171	10.836	-1.209	80.766	0
	135	544	545	548	559	560	573	580	1309	1310.19	1317.47	1345.21	1346.41	1377.83	1394.69	1.19	8.47	1.194	32.617	16.861
	157	150	150	152	264	265	276	276	360.229	359.057	363.816	634.846	636.047	662.661	662.661	-1.172	3.587	1.201	27.815	0
	161	371	371	380	413	413	428	428	892.606	891.431	913.068	993.72	992.543	1028.65	1028.65	-1.175	20.462	-1.177	34.933	0
	171	398	398	403	409	410	434	534	957.652	956.479	968.463	984.065	985.257	1043.08	1283.73	-1.173	10.811	1.192	59.013	240.651
	243	155	156	161	265	266	296	302	372.253	373.46	385.445	637.22	638.453	710.863	725.294	1.207	13.192	1.233	73.643	14.431
	275	270	271	286	307	308	332	505	649.442	650.636	686.768	738.601	739.86	797.467	1214.1	1.194	37.326	1.259	58.866	416.629
	279	158	158	161	212	213	224	224	379.479	378.271	385.445	509.655	510.845	537.449	537.449	-1.208	5.966	1.19	27.794	0
	282	307	307	312	363	363	390	390	738.601	737.394	749.45	873.239	872.068	937.212	937.212	-1.207	10.849	-1.171	63.973	0
	284	328	329	333	435	435	445	445	789.104	790.297	799.885	1046.66	1045.48	1069.49	1069.49	1.193	10.781	-1.182	22.831	0
	288	339	340	367	516	516	540	542	815.571	816.761	881.75	1241.69	1240.52	1298.08	1302.92	1.19	66.179	-1.173	56.389	4.846
	291	120	121	135	178	178	187	188	287.814	289.027	322.815	427.889	426.696	448.259	450.639	1.213	35.001	-1.193	20.37	2.38
080420_1286	3	394	395	402	456	455	480	590	950.816	952.043	968.972	1101.08	1097.38	1158.21	1424.68	1.227	18.156	-3.699	57.134	266.463
	11	416	416	423	448	449	461	461	1003.86	1002.65	1019.63	1081.64	1082.86	1112.05	1112.05	-1.204	15.777	1.215	30.405	0
	15	232	232	243	272	273	294	294	560.053	558.881	585.217	656.334	657.571	708.44	708.44	-1.172	25.164	1.237	52.106	0
	19	208	209	221	236	237	259	259	502.162	503.357	532.275	569.677	570.891	623.727	623.727	1.195	30.113	1.214	54.05	0
	62	386	386	391	409	410	429	463	931.351	930.17	942.448	987.054	988.248	1034.18	1116.87	-1.181	11.097	1.194	47.124	82.692
	77	273	274	281	356	357	410	410	658.801	660.039	676.862	858.858	860.075	988.248	988.248	1.238	18.061	1.217	129.39	0
	87	28	29	47	75	76	127	127	66.413	67.604	111.012	179.425	180.613	303.239	303.239	1.191	44.599	1.188	123.814	0
	94	494	494	501	525	526	536	536	1193.48	1192.27	1209.28	1268.84	1270.12	1294.28	1294.28	-1.206	15.807	1.286	25.438	0
	147	289	290	302	321	322	331	331	697.51	698.727	727.617	774.662	775.856	797.577	797.577	1.217	30.107	1.194	22.915	0
	152	275	275	282	313	313	335	335	663.607	662.437	679.284	755.271	754.096	807.225	807.225	-1.17	15.677	-1.175	51.954	0
	159	23	24	33	146	145	157	158	54.417	55.607	77.244	352.816	349.179	378.066	380.513	1.19	22.827	-3.637	25.25	2.447
	160	332	331	342	389	389	434	435	801.201	797.577	823.997	938.789	937.618	1046.31	1048.82	-3.624	22.796	-1.171	107.522	2.506
	177	354	354	356	362	362	378	378	854.036	852.851	857.62	873.26	872.077	910.792	910.792	-1.185	3.584	-1.183	37.532	0
	179	24	25	48	95	96	144	144	56.791	58	113.404	227.386	228.579	346.803	346.803	1.209	56.613	1.193	119.417	0
	211	214	215	223	315	315	326	399	516.613	517.813	537.163	760.116	758.945	785.445	961.661	1.2	20.55	-1.171	25.329	176.216
	212	334	335	375	395	395	420	420	806.034	807.225	903.484	953.215	952.043	1012.36	1012.36	1.191	97.45	-1.172	59.142	0
	239	30	31	41	65	65	100	100	71.175	72.396	96.583	155.452	154.242	238.184	238.184	1.221	25.408	-1.21	82.732	0
	254	255	256	267	269	270	300	300	615.224	616.436	643.071	649.027	650.285	722.835	722.835	1.212	27.847	1.258	73.808	0
	279	113	113	120	195	196	228	229	270.623	269.453	286.388	470.757	471.99	549.234	551.641	-1.17	15.765	1.233	78.477	2.407
	307	524	525	534	578	578	587	587	1266.31	1267.66	1289.48	1396.94	1395.7	1417.49	1417.49	1.35	23.173	-1.243	20.548	0
																	30.2763		56.0072
																	24.2998		43.3951
																	2.36021		4.21491

## Sheet: EFRET (M1 + 10s)
	AOI	Frame	Efret val (in -2:+2)
s1292	5	547	0.967712
	5	548	0.714468
	5	549	0.711633
	5	550	0.674157
	41	526	1.05273
	41	527	0.963336
	41	528	0.892541
	41	529	0.925056
	53	513	1.04822
	53	514	0.883946
	53	515	1.20962
	53	516	0.620113
	98	530	0.951612
	98	531	0.499993
	98	532	0.881783
	98	533	1.01107
	99	103	0.428003
	99	104	0.437107
	99	105	0.728708
	99	106	0.852722
	135	545	1.4413
	135	546	0.663581
	135	548	0.509775
	157	151	1.00794
	157	152	0.814384
	157	153	-0.0887953
	157	154	0.194108
	161	372	0.310172
	161	373	0.707281
	161	374	0.680601
	161	375	0.685473
	171	399	0.466931
	171	400	0.275563
	171	401	0.721872
	171	402	0.632964
	243	156	1.04339
	243	157	0.794373
	243	158	0.212681
	243	159	0.805883
	275	271	0.527684
	275	272	1.00996
	275	273	0.904118
	275	274	0.590772
	279	159	0.698132
	279	160	0.893352
	279	161	0.962305
	279	162	-0.302602
	282	308	0.642473
	282	309	0.733048
	282	310	0.644211
	282	311	0.813757
	284	329	0.630106
	284	330	1.05137
	284	331	0.753974
	284	332	0.516129
	288	340	0.947321
	288	341	0.7825
	288	342	1.10724
	288	343	1.4561
	291	121	0.884639
	291	122	1.2373
	291	123	0.513288
	291	124	0.6093
s1010	6	248	1.36548
	6	249	0.586739
	6	250	0.789735
	6	251	0.789025
	21	181	0.613671
	21	182	0.928687
	21	183	0.659779
	21	184	0.450325
	67	230	0.815529
	67	231	1.25145
	67	232	0.892962
	67	233	1.11145
	69	409	0.775963
	69	410	0.447574
	69	411	0.395836
	69	412	0.801111
	76	252	0.988266
	76	253	1.08586
	76	254	0.963631
	76	255	0.878249
	77	385	1.18574
	77	386	1.02137
	77	387	0.444933
	77	388	0.258579
	105	215	0.642753
	105	216	0.756993
	105	217	0.830352
	105	218	0.628988
	130	289	1.00826
	130	290	0.865728
	130	291	0.868507
	130	292	0.632371
	150	215	0.201824
	150	216	0.74563
	150	217	0.902792
	150	218	0.365671
	152	173	0.920559
	152	174	0.777648
	152	175	0.448973
	152	176	0.580615
	161	438	0.860148
	161	439	0.286277
	161	440	0.28428
	161	441	0.651528
	200	528	0.539147
	200	529	0.895374
	200	530	0.812789
	200	531	0.598508
	210	109	1.17787
	210	110	0.732352
	210	111	0.724257
	210	112	0.15311
	215	226	0.670027
	215	227	0.384426
	215	228	0.931901
	215	229	0.388884
	219	280	0.794545
	219	281	0.739618
	219	282	0.944127
	219	283	0.945737
	228	255	0.926514
	228	256	0.911756
	228	257	0.550388
	228	258	1.09645
	241	145	0.88398
	241	146	0.581492
	241	147	0.865217
	241	148	0.58442
	259	485	0.817079
	259	486	0.977097
	259	487	0.950928
	259	488	0.884892
	283	121	0.682707
	283	122	0.705369
	283	123	0.387761
	283	124	0.676359
	293	213	0.748491
	293	214	0.971831
	293	215	0.640827
	293	216	0.340011
	314	75	0.792293
	314	76	0.760106
	314	77	0.67017
	314	78	0.779583
	330	543	0.789744
	330	544	0.506019
	330	545	0.852438
	330	546	0.755813
	332	298	0.832524
	332	299	0.374294
	332	300	0.500759
	332	301	0.824376
	349	202	1.12181
	349	203	0.598735
	349	204	0.427951
	349	205	0.814587
	350	490	0.836815
	350	491	0.340225
	350	492	0.21219
	350	493	0.561248
	352	543	0.502996
	352	544	0.352933
	352	545	0.113793
	352	546	0.601864
	354	330	0.250597
	354	331	0.912642
	354	332	1.0384
	354	333	0.913188
	375	438	0.756706
	375	439	0.753007
	375	440	0.791594
	375	441	0.719018
	376	221	0.798869
	376	222	0.935181
	376	223	0.836061
	376	224	0.703101
	387	212	0.568391
	387	213	0.497082
	387	214	0.881253
	387	215	0.864478
	428	210	0.847183
	428	211	0.946136
	428	212	0.6348
	428	213	1.00548
	434	82	0.836905
	434	83	0.905192
	434	84	1.35347
	434	85	1.08386
	443	518	0.850758
	443	519	0.63111
	443	520	1.0423
	443	521	0.0216167
s644	10	440	0.777552
	10	441	0.813218
	10	442	0.466353
	10	443	0.830695
	22	472	0.769956
	22	473	0.793749
	22	474	0.761922
	22	475	0.92461
	24	92	0.669563
	24	93	-0.141601
	24	94	0.770028
	24	95	0.999866
	31	532	-0.0412602
	31	533	0.540335
	31	534	0.794258
	31	535	0.763243
	32	262	0.69996
	32	263	0.142357
	32	264	0.223073
	32	265	0.514198
	37	369	1.38196
	37	370	0.754794
	37	371	0.472627
	37	372	0.553135
	38	449	0.770522
	38	450	-0.0401974
	38	451	0.134584
	38	452	0.297991
	39	123	0.528866
	39	124	0.82427
	39	125	0.727798
	39	126	0.347818
	60	433	0.541117
	60	434	0.569845
	60	435	0.702423
	60	436	0.633793
	63	389	0.719735
	63	390	0.688125
	63	391	0.53487
	63	392	0.0964174
	67	52	0.729417
	67	53	0.214169
	67	54	0.272924
	67	55	0.697768
	70	43	0.742989
	70	44	0.488257
	70	45	0.771551
	70	46	0.750363
	93	112	0.243678
	93	113	0.518025
	93	114	0.346363
	93	115	0.663183
	98	76	0.944188
	98	77	0.333236
	98	78	0.375901
	98	79	0.769679
	104	405	0.72694
	104	406	0.96741
	104	407	0.821529
	104	408	0.925442
	110	284	0.290743
	110	285	1.01935
	110	286	0.384556
	110	287	0.511435
	114	207	0.719674
	114	208	0.833552
	114	209	0.923919
	114	210	0.753812
	120	311	0.642932
	120	312	0.33465
	120	313	0.772781
	120	314	0.816806
	126	363	0.935491
	126	364	0.688967
	126	365	0.416741
	126	366	0.775391
	129	389	0.770471
	129	390	0.873378
	129	391	0.801081
	129	392	0.942517
	137	289	1.0128
	137	290	1.01743
	137	291	1.04784
	137	292	1.07335
	138	271	1.15534
	138	272	1.24772
	138	273	0.903479
	138	274	1.03039
	142	259	1.13645
	142	260	0.838462
	142	261	0.984155
	142	262	0.794998
	144	193	0.500122
	144	194	0.542102
	144	195	0.600777
	144	196	0.55831
	157	37	0.725675
	157	38	0.800711
	157	39	0.466903
	157	40	0.809335
	163	108	0.473712
	163	109	-0.23787
	163	110	0.766879
	163	111	0.853638
	166	75	0.641493
	166	76	0.796811
	166	77	0.492965
	166	78	0.683594
	185	148	1.20575
	185	149	0.630657
	185	150	1.0157
	185	151	0.0658253
	187	29	0.527545
	187	30	0.407675
	187	31	0.399431
	187	32	0.416542
	200	506	0.963571
	200	507	1.27141
	200	508	1.43438
	200	509	1.34588
	202	269	0.876382
	202	270	0.505556
	202	271	0.369063
	202	272	0.556274
	228	46	0.744094
	228	47	0.683664
	228	48	0.573368
	228	49	0.71445
	230	65	0.769229
	230	66	1.10448
	230	67	1.12593
	230	68	0.872534
	232	177	0.542708
	232	178	0.465782
	232	179	0.500738
	232	180	0.498636
	237	157	0.672522
	237	158	0.80349
	237	159	0.947847
	237	160	0.629954
	238	146	0.898547
	238	147	0.63855
	238	148	0.450543
	238	149	0.381537
	240	392	0.848134
	240	393	0.515274
	240	394	0.76336
	240	395	1.08808
s1286	3	395	0.689465
	3	396	1.09689
	3	397	0.756065
	3	398	1.05225
	11	417	1.04567
	11	418	0.912932
	11	419	0.982917
	11	420	1.07645
	15	233	1.35781
	15	234	0.444104
	15	235	0.396184
	15	236	0.4849
	19	209	0.864709
	19	210	1.06029
	19	211	0.799378
	19	212	0.867996
	62	387	0.0815682
	62	389	0.679475
	62	390	0.343262
	77	274	0.511032
	77	275	0.332798
	77	276	0.838165
	77	277	0.999206
	87	29	0.793988
	87	30	0.822729
	87	31	0.970346
	87	32	1.01388
	94	495	1.03354
	94	496	0.957573
	94	497	0.860425
	94	498	0.780436
	147	290	0.323867
	147	291	0.638447
	147	292	0.413864
	147	293	0.296153
	152	276	0.562291
	152	277	0.209975
	152	278	0.350635
	152	279	0.558479
	159	24	1.0149
	159	25	0.984042
	159	26	0.883979
	159	27	0.802267
	160	333	0.770795
	160	334	0.832245
	160	335	1.01757
	160	336	1.01227
	177	355	1.00224
	177	356	0.870302
	177	357	0.350369
	177	358	-0.609331
	179	25	1.04611
	179	26	0.292041
	179	27	0.135929
	179	28	1.34501
	211	215	0.676792
	211	216	0.634198
	211	217	0.420259
	211	218	0.949666
	212	335	1.04079
	212	336	0.696572
	212	337	0.673366
	212	338	0.620092
	239	31	0.818177
	239	32	0.779619
	239	33	0.743247
	239	34	0.788173
	254	256	0.742939
	254	257	0.593927
	254	258	0.374887
	254	259	0.379669
	279	114	1.24807
	279	115	0.998767
	279	116	0.896781
	279	117	1.7197
	307	525	1.26454
	307	526	0.802002
	307	527	0.603872
	307	528	1.12728
			0.720358
			0.295355
			0.0143776

## Sheet: EFRET (M2 - 10s)
	AOI	Frame	Efret val (in -2:+2)
s1292	5	556	-0.491242
	5	557	-1.00506
	5	558	0.0621541
	5	559	0.549173
	41	577	-0.465433
	41	578	-0.313275
	41	579	-1.77904
	41	580	0.365372
	53	535	-0.148302
	53	536	0.0526151
	53	537	-0.0994719
	53	538	0.0887301
	98	540	0.00868609
	98	541	0.0700687
	98	542	0.0596411
	98	543	0.509681
	99	110	0.0384964
	99	111	-0.122725
	99	112	-0.202457
	99	113	0.69498
	135	556	0.273819
	135	557	0.633624
	135	558	1.22788
	135	559	0.0153524
	157	261	-0.307904
	157	262	-0.213432
	157	263	-0.04326
	157	264	0.0181647
	161	410	0.59599
	161	411	0.221474
	161	412	-0.500021
	161	413	0.696958
	171	406	0.474906
	171	407	0.408946
	171	408	-0.0155413
	171	409	0.0423442
	243	262	0.786426
	243	263	-0.0940106
	243	264	-0.215391
	243	265	0.0834619
	275	304	-1.19532
	275	305	0.216286
	275	306	-0.480402
	275	307	0.00207384
	279	209	-0.27664
	279	210	-0.270766
	279	211	-1.86349
	279	212	0.0655658
	282	361	-0.00623156
	282	362	0.311759
	282	363	0.859716
	284	432	-0.0392786
	284	433	-0.135121
	284	434	0.10918
	284	435	0.724995
	288	513	-0.270893
	288	514	0.127113
	288	515	-0.0899038
	288	516	0.830046
	291	175	-0.876215
	291	176	0.00833859
	291	177	0.0751029
	291	178	0.394281
s1010	6	293	0.55589
	6	294	-0.394399
	6	296	-0.674023
	21	218	-1.01298
	21	219	-0.0171138
	21	220	0.233448
	21	221	1.32092
	67	238	-0.258635
	67	239	-0.033663
	67	240	0.240505
	67	241	0.773308
	69	548	0.144577
	69	549	0.776342
	69	550	-0.262424
	69	551	-0.179722
	76	391	0.0114552
	76	392	-0.0598604
	76	393	-0.0295446
	76	394	0.188534
	77	410	-0.256719
	77	411	0.0437097
	77	412	0.0895914
	77	413	0.209981
	105	252	0.684348
	105	253	0.678763
	105	254	-0.184657
	105	255	0.0919187
	130	345	-0.0801112
	130	346	-0.086666
	130	347	0.119405
	130	348	0.524283
	150	393	0.424676
	150	394	-0.0195786
	150	395	0.0242877
	150	396	0.767237
	152	189	0.0861727
	152	190	0.274782
	152	191	0.133051
	152	192	0.724485
	161	519	0.0752424
	161	520	-0.0207223
	161	521	-0.211531
	161	522	0.34567
	200	577	0.871146
	200	578	0.314339
	200	579	-0.35881
	200	580	0.517727
	210	112	0.15311
	210	113	0.407288
	210	114	0.341679
	210	115	-0.24276
	215	290	0.113477
	215	291	0.385417
	215	292	0.817682
	215	293	0.922652
	219	302	0.431877
	219	303	0.129106
	219	304	-0.187066
	219	305	0.186767
	228	302	1.06421
	228	303	-0.190277
	228	304	-0.401691
	228	305	0.12786
	241	401	-0.0885252
	241	402	0.126383
	241	403	0.113943
	241	404	0.341114
	259	500	0.105093
	259	501	0.211683
	259	502	-0.0796678
	259	503	0.300461
	283	228	0.0138147
	283	229	-0.00328594
	283	230	0.00110017
	283	231	0.534471
	293	224	-0.0526156
	293	225	0.297197
	293	226	0.260486
	293	227	0.311854
	314	94	0.152948
	314	95	0.33524
	314	96	-0.00867387
	314	97	0.647742
	330	566	-0.179269
	330	567	-0.079908
	330	568	0.197532
	330	569	0.657169
	332	315	-0.0390431
	332	316	0.605047
	332	317	-0.119379
	332	318	-0.0534793
	349	220	0.273528
	349	221	-0.317928
	349	222	0.0029607
	349	223	0.687274
	350	516	0.0845593
	350	517	0.154136
	350	518	0.232131
	350	519	0.769607
	352	556	0.941947
	352	557	-0.0175402
	352	558	0.0139291
	352	559	0.911159
	354	411	-0.285904
	354	412	0.114547
	354	413	0.0762322
	354	414	0.731847
	375	507	0.163808
	375	508	-0.109916
	375	509	0.0118783
	375	510	0.518849
	376	344	0.0138021
	376	345	0.302858
	376	346	-0.0561218
	376	347	0.768978
	387	219	0.175676
	387	220	0.043967
	387	221	0.0275206
	387	222	0.733846
	428	228	-0.123334
	428	229	-0.205532
	428	230	0.0231551
	428	231	0.547565
	434	167	-0.202008
	434	168	-0.241495
	434	169	0.19469
	434	170	-0.0482403
	443	537	0.0531614
	443	538	0.230021
	443	539	0.330016
	443	540	0.438046
s644	10	482	0.363875
	10	483	0.179569
	10	484	0.284854
	10	485	0.0965516
	22	493	-1.24306
	22	494	-0.476514
	22	495	-0.0217016
	22	496	0.338743
	24	128	0.205515
	24	129	0.0827061
	24	130	0.00341981
	24	131	-0.0287143
	31	541	0.303117
	31	542	-1.62894
	31	543	0.121035
	31	544	0.885333
	32	368	0.245686
	32	369	-0.307946
	32	370	0.0672327
	32	371	-0.396581
	37	504	-0.358387
	37	505	-0.155116
	37	507	-1.07661
	38	473	-0.0466702
	38	474	-0.0360377
	38	475	-1.51112
	38	476	0.913211
	39	264	0.311525
	39	265	0.23545
	39	266	0.244799
	60	443	-0.218627
	60	444	-0.119929
	60	445	-0.194907
	60	446	-2.54427e-05
	63	437	-0.153407
	63	438	0.194299
	63	439	-0.629987
	63	440	0.186672
	67	93	-0.0367351
	67	94	-0.314318
	67	95	0.0812724
	67	96	0.656438
	70	99	-0.0890843
	70	100	0.1457
	70	101	-0.347651
	70	102	0.790153
	93	150	-0.754215
	93	151	0.374432
	93	152	0.14056
	93	153	0.865924
	98	96	-0.042734
	98	97	0.811597
	98	98	0.746103
	98	99	0.395424
	104	480	0.00215924
	104	481	0.225519
	104	482	0.235294
	104	483	0.153151
	110	325	0.759128
	110	326	-0.0976534
	110	327	0.0691572
	110	328	0.349914
	114	286	-0.138141
	114	287	0.369983
	114	288	-0.241936
	114	289	-0.494966
	120	336	0.203201
	120	337	-0.171929
	120	338	-0.0933134
	120	339	0.327465
	126	405	0.766808
	126	406	0.116428
	126	407	-0.00604796
	126	408	-0.0988303
	129	402	-0.334446
	129	403	-0.104231
	129	404	0.124795
	129	405	0.364808
	137	398	0.376263
	137	399	-0.834811
	137	400	0.370132
	137	401	0.248711
	138	296	0.453569
	138	297	0.0240548
	138	298	0.235219
	138	299	0.847753
	142	314	-0.211835
	142	315	0.00206725
	142	316	0.249365
	142	317	0.0399335
	144	240	0.0402317
	144	241	0.0185838
	144	242	0.053211
	144	243	0.622132
	157	105	-0.103559
	157	107	0.328851
	157	108	0.644056
	163	210	-0.0169015
	163	211	0.183777
	163	212	0.165879
	163	213	0.00369098
	166	177	-1.9608
	166	178	-0.0169714
	166	179	0.237336
	166	180	-0.330177
	185	207	0.317785
	185	208	0.106321
	185	209	0.0176884
	185	210	-0.533917
	187	44	0.277688
	187	45	-0.368875
	187	46	0.15763
	187	47	-0.583114
	200	563	0.765724
	200	564	0.229713
	200	565	0.453101
	200	566	-0.118328
	202	308	0.149868
	202	309	0.0468271
	202	310	0.141031
	202	311	0.35899
	228	220	0.427156
	228	221	0.158995
	228	222	-0.292372
	228	223	0.592207
	230	93	0.21242
	230	94	0.192262
	230	95	0.19266
	230	96	0.565578
	232	226	-0.219682
	232	227	-0.0939282
	232	228	-0.197438
	232	229	-0.0819608
	237	289	0.772221
	237	290	0.089592
	237	292	-1.6261
	238	187	0.108727
	238	188	-0.321245
	238	189	-0.20845
	238	190	0.446632
	240	422	-0.244934
	240	423	-0.0161839
	240	424	0.197902
	240	425	0.63173
s1286	3	453	-1.14069
	3	454	0.0114198
	3	455	0.566221
	3	456	0.660069
	11	445	-0.186973
	11	446	-0.666573
	11	447	-0.152543
	11	448	0.20302
	15	269	0.0739443
	15	270	0.331528
	15	271	0.104767
	15	272	-0.0839247
	19	233	0.122841
	19	234	-0.036767
	19	235	-1.54823
	19	236	-0.0143308
	62	406	-1.16501
	62	408	0.322145
	62	409	0.109111
	77	353	0.243502
	77	354	-0.186912
	77	355	-1.25213
	87	72	-0.400912
	87	73	-0.272854
	87	74	-0.143138
	87	75	0.221735
	94	522	0.620446
	94	523	0.281594
	94	524	-0.0461762
	94	525	0.270365
	147	318	0.811815
	147	319	0.0835724
	147	320	-0.226812
	147	321	0.00699487
	152	310	0.0536739
	152	311	0.309271
	152	312	0.48662
	152	313	0.134093
	159	143	0.107662
	159	144	-0.409538
	159	145	0.322868
	159	146	0.874116
	160	386	-0.623075
	160	387	0.158
	160	389	0.361372
	177	359	-0.308916
	177	360	0.23066
	177	361	0.0153945
	177	362	0.310179
	179	92	-0.289795
	179	93	-0.122527
	179	94	0.140229
	179	95	-0.158069
	211	312	0.36058
	211	313	-0.777423
	211	315	0.649965
	212	392	0.0125451
	212	393	0.372712
	212	394	-0.958132
	212	395	0.691969
	239	32	0.779619
	239	33	0.743247
	239	34	0.788173
	239	35	0.761009
	254	268	0.0222319
	254	269	0.0250723
	279	192	-0.141879
	279	193	-0.375562
	279	194	-0.104151
	279	195	-0.477378
	307	575	0.294453
	307	577	-0.562959
	307	578	0.737063
			0.0791151
			0.46423
			0.0228988

## Sheet: EFRET (M2 + 10s)
	AOI	Frame	Efret val (in -2:+2)
s1292	5	560	0.780699
	5	561	0.947622
	5	562	0.753033
	5	563	1.07293
	41	581	0.825385
	41	582	0.487861
	41	583	0.67856
	41	584	0.470118
	53	539	0.301101
	53	540	0.816539
	53	541	0.771227
	53	542	0.476786
	98	544	0.728913
	98	545	1.01467
	98	546	0.873273
	98	547	0.871408
	99	114	0.866491
	99	115	1.01262
	99	116	0.720554
	99	117	0.610362
	135	560	0.78111
	135	561	1.31612
	135	562	1.52692
	135	563	1.50656
	157	265	0.982785
	157	266	0.529914
	157	267	0.568893
	157	268	0.960959
	161	414	0.792658
	161	415	0.805556
	161	416	0.790709
	161	417	0.622141
	171	410	0.860863
	171	411	1.19286
	171	412	1.10088
	171	413	0.8502
	243	266	0.766026
	243	267	1.32886
	243	268	0.801517
	243	269	0.804191
	275	308	0.932749
	275	309	0.932893
	275	310	0.901716
	275	311	0.655898
	279	213	0.80511
	279	214	0.892177
	279	215	0.924467
	279	216	0.842601
	282	364	0.843145
	282	365	0.883281
	282	366	0.716835
	282	367	0.967281
	284	436	0.333993
	284	437	0.4843
	284	438	0.959842
	284	439	0.90337
	288	517	0.787471
	288	518	0.831923
	288	519	0.843386
	288	520	0.647021
	291	179	0.880653
	291	180	0.581897
	291	181	0.777917
	291	182	0.846964
s1010	6	297	0.973984
	6	298	1.2785
	6	299	1.05162
	6	300	1.14143
	21	222	1.09643
	21	223	1.27711
	21	224	0.789511
	21	225	1.05952
	67	242	0.71661
	67	243	0.716095
	67	244	0.861413
	67	245	0.759977
	69	552	0.790871
	69	553	0.961968
	69	554	1.0381
	69	555	0.948103
	76	395	0.76971
	76	396	0.902985
	76	397	0.813683
	76	398	0.788696
	77	414	0.777139
	77	415	0.351183
	77	416	0.511291
	77	417	0.848775
	105	256	0.518711
	105	257	0.803196
	105	258	0.771924
	105	259	0.769771
	130	349	0.923333
	130	350	1.0845
	130	351	0.861652
	130	352	0.774417
	150	397	0.923913
	150	398	0.874038
	150	399	0.424689
	150	400	0.738901
	152	193	0.752572
	152	194	0.711812
	152	195	0.563336
	152	196	0.516367
	161	523	1.02872
	161	524	0.47718
	161	525	0.619418
	161	526	0.683372
	200	581	0.742341
	200	582	1.04072
	200	583	0.53179
	200	584	0.600035
	210	116	0.973591
	210	117	0.609848
	210	118	0.696938
	210	119	1.55474
	215	294	0.642518
	215	295	0.588887
	215	296	0.599536
	215	297	0.902448
	219	306	0.875988
	219	307	0.687386
	219	308	0.62334
	219	309	0.709449
	228	306	0.994023
	228	307	0.824648
	228	308	1.01353
	228	309	0.984216
	241	405	0.355756
	241	406	0.397138
	241	407	0.730255
	241	408	0.848259
	259	504	1.00872
	259	505	0.721659
	259	506	0.748704
	259	507	0.815858
	283	232	1.13578
	283	233	0.886258
	283	234	0.981386
	283	235	0.451981
	293	228	0.871161
	293	229	0.514527
	293	230	0.512387
	293	231	0.473689
	314	98	0.84688
	314	99	0.48649
	314	100	0.841056
	314	101	0.887533
	330	570	0.435437
	330	571	0.991043
	330	572	0.672748
	330	573	1.07605
	332	319	0.72471
	332	320	0.738364
	332	321	0.693124
	332	322	0.860703
	349	224	0.913541
	349	225	0.408603
	349	226	0.515025
	349	227	0.616595
	350	520	0.821446
	350	521	0.773409
	350	522	0.766618
	350	523	0.959863
	352	560	0.945823
	352	561	1.01059
	352	562	0.929639
	352	563	0.953463
	354	415	0.688959
	354	416	0.706197
	354	417	1.26009
	354	418	0.616961
	375	511	0.928022
	375	512	1.00941
	375	513	1.15235
	375	514	1.03182
	376	348	0.668573
	376	349	0.765275
	376	350	0.994337
	376	351	1.09392
	387	223	1.11791
	387	224	0.782736
	387	225	0.96839
	387	226	0.952131
	428	232	1.03715
	428	233	0.784652
	428	234	1.04295
	428	235	1.11934
	434	171	0.716396
	434	172	1.06359
	434	173	0.840794
	434	174	0.711072
	443	541	0.789835
	443	542	0.717387
	443	543	0.57532
	443	544	0.591709
s644	10	486	0.0732626
	10	487	0.895741
	10	488	0.937637
	10	489	0.760332
	22	497	1.02053
	22	498	0.778409
	22	499	0.856152
	22	500	0.721611
	24	132	0.487433
	24	133	0.512292
	24	134	-0.102354
	24	135	0.552139
	31	545	1.16088
	31	546	1.0978
	31	547	0.56332
	31	548	0.846507
	32	372	-0.352946
	32	373	0.901671
	32	374	0.844369
	32	375	0.718907
	37	508	0.555471
	37	509	0.546285
	37	510	0.911848
	37	511	1.18908
	38	477	0.932895
	38	478	0.9955
	38	479	0.491503
	38	480	0.691107
	39	268	0.380064
	39	269	-0.206742
	39	270	0.810255
	39	271	0.863802
	60	447	0.62165
	60	448	0.796091
	60	449	0.936264
	60	450	0.889669
	63	441	0.882016
	63	442	0.922194
	63	443	0.737676
	63	444	1.10667
	67	97	0.411806
	67	98	0.656093
	67	99	0.604991
	67	100	0.440391
	70	103	0.919911
	70	104	0.663471
	70	105	0.965615
	70	106	0.857939
	93	154	0.469808
	93	155	0.253617
	93	156	0.471658
	93	157	0.699455
	98	100	1.00393
	98	101	1.07852
	98	102	1.08368
	98	103	0.257784
	104	484	0.605104
	104	485	0.828073
	104	486	1.01119
	104	487	0.744764
	110	329	0.723522
	110	330	0.343917
	110	331	0.426638
	110	332	0.785651
	114	290	0.932769
	114	291	0.802237
	114	292	0.866229
	114	293	0.651013
	120	340	0.379841
	120	341	0.913794
	120	342	1.04989
	120	343	1.02802
	126	409	0.903736
	126	410	0.428485
	126	411	0.668864
	126	412	0.793834
	129	406	0.810747
	129	407	0.835031
	129	408	0.692799
	129	409	0.758331
	137	402	0.927877
	137	403	0.480487
	137	404	0.408628
	137	405	0.766236
	138	300	0.708394
	138	301	0.840179
	138	302	0.775281
	138	303	0.187956
	142	318	0.914152
	142	319	0.270456
	142	320	0.548578
	142	321	0.783342
	144	244	0.334916
	144	245	0.491359
	144	246	0.535859
	144	247	0.509702
	157	109	0.929313
	157	110	0.697345
	157	111	1.06826
	157	112	0.964842
	163	214	0.859478
	163	215	0.259742
	163	216	0.3968
	163	217	0.596373
	166	181	0.883966
	166	182	0.86824
	166	183	0.897979
	166	184	0.88039
	185	211	1.02726
	185	212	0.913193
	185	213	1.01753
	185	214	0.838864
	187	48	0.935024
	187	49	1.09883
	187	50	0.890071
	187	51	0.902123
	200	567	0.863305
	200	568	1.02484
	200	569	1.01426
	200	570	0.386183
	202	312	0.850132
	202	313	0.719062
	202	314	0.950152
	202	315	0.96178
	228	224	0.843356
	228	225	0.261205
	228	226	0.773308
	228	227	0.758479
	230	97	0.0502124
	230	98	1.14468
	230	99	0.752372
	230	100	0.725915
	232	231	0.497664
	232	232	0.625371
	232	233	1.02437
	237	293	0.903188
	237	294	1.00052
	237	295	0.815679
	237	296	0.762156
	238	191	0.754751
	238	192	0.720454
	238	193	1.22557
	238	194	1.08908
	240	426	0.848814
	240	427	0.890772
	240	428	0.8128
	240	429	0.908081
s1286	3	457	0.804076
	3	458	0.657123
	3	459	0.632601
	3	460	0.700496
	11	449	0.675136
	11	450	0.639569
	11	451	0.477721
	11	452	0.374839
	15	273	0.880914
	15	274	0.694011
	15	275	1.16691
	15	276	1.01322
	19	237	1.14028
	19	238	0.779654
	19	239	0.710258
	19	240	0.766678
	62	410	0.996189
	62	411	0.890903
	62	412	1.10656
	62	413	1.00871
	77	357	0.943609
	77	358	0.827989
	77	359	0.743172
	77	360	0.894104
	87	76	0.959481
	87	77	0.719484
	87	78	0.84436
	87	79	0.751293
	94	526	0.746901
	94	527	0.873244
	94	528	0.502882
	94	529	0.735037
	147	322	0.519246
	147	323	0.601902
	147	324	0.934164
	147	325	0.0832008
	152	314	0.782355
	152	315	0.772008
	152	316	-0.181327
	152	317	0.775965
	159	147	0.611159
	159	148	0.670621
	159	149	0.767661
	159	150	0.897706
	160	390	1.13363
	160	391	0.801258
	160	392	1.53571
	160	393	1.35877
	177	363	0.598111
	177	364	0.487085
	177	365	0.549564
	177	366	0.80346
	179	96	1.21364
	179	97	1.19344
	179	98	1.00271
	179	99	0.785942
	211	316	1.03616
	211	317	0.837893
	211	318	0.731981
	211	319	1.05167
	212	396	0.884584
	212	397	0.998405
	212	398	0.799611
	212	399	0.865405
	239	36	0.717999
	239	37	0.549634
	239	38	0.754151
	239	39	0.609638
	254	270	0.852121
	254	271	0.239794
	254	272	1.10639
	254	273	0.687974
	279	196	0.639175
	279	197	0.736101
	279	198	0.816533
	279	199	1.52003
	307	579	1.25489
	307	580	0.715648
	307	581	0.556126
	307	582	0.412842
			0.786493
			0.253015
			0.012302
