# Supplementary material for: A helicase-tethered ORC flip enables bidirectional helicase loading
Source: eLife journal article supplement (doi:10.7554/elife.74282), 2021-12-09
Supplement: supp [file elife-74282-supp-v1.zip › elife_poa_e74282_Figure_2_figure_supplement_1_source_data_1.xlsx]

## Sheet: Helicase_Loading_Fig1_supp1
Quantification of Mcm5 band normalized to unlabeled protein control
	Repeat 1	Repeat 2	Mean	STD-dev
Unlabeled Control	1	1	1	0
Mcm2-72C-649/ORC5C-549	0.786133	0.752945	0.769539	0.0234672
Mcm2-74N-650/ORC5C-549	1.15288	0.889469	1.02117	0.18626
Mcm2-72C-649/ORC1N-550	0.452711	0.651236	0.551974	0.140378
Mcm2-72C-649/ORC5C-549/Cdt1N-649	0.73669	0.714197	0.725444	0.0159052
