# Supplementary material for: A helicase-tethered ORC flip enables bidirectional helicase loading
Source: eLife journal article supplement (doi:10.7554/elife.74282), 2021-12-09
Supplement: supp [file elife-74282-supp-v1.zip › elife_poa_e74282_Figure_2_source_data_1.xlsx]

## Sheet: Total 
Experiment	CC (High-high)	NN (low, low)	CN (high, low)	NC (low, high)
Rep 1: 012420_1052	11	9	10	9
Rep 2: 092520_1481	14	12	12	13
Total (90)	25	21	22	22	90
Fraction	0.277778	0.233333	0.244444	0.244444
SE	0.0472131	0.0445831	0.0453004	0.0453004

## Sheet: Rep1 (012420_1052)
CC (High-high)	NN (low, low)	CN (high, low)	NC (low, high)
1	4	236	162
52	186	307	270
255	187	346	301
320	238	395	315
324	272	446	334
326	343	494	387
371	365	500	405
452	378	504	436
480	487	556	531
529		491
564
11	9	10	9

## Sheet: Rep 2 (092520_1481)
CC (High-high)	NN (low, low)	CN (high, low)	NC (low, high)
2	23	10	25
9	48	42	31
17	50	84	49
19	58	85	79
83	89	136	80
109	111	147	88
130	143	220	148
145	159	225	157
162	209	234	236
216	212	254	242
244	219	261	272
285	263	312	296
325			299
334
14	12	12	13
