# Supplementary material for: A helicase-tethered ORC flip enables bidirectional helicase loading
Source: eLife journal article supplement (doi:10.7554/elife.74282), 2021-12-09
Supplement: supp [file elife-74282-supp-v1.zip › elife_poa_e74282_Figure_3_source_data_1.xlsx]

## Sheet: Tally 
Raw number of observations
	Expt tag	CC	NN	CN	NC	Total
Rep 1 (N =17)	2027	8	8	0	1	17
Rep 2 (N = 22)	2100	9	13	0	0	22
Rep 3 (N = 25)	2119	12	12	1	0	25
Rep 4 (N = 18)	2132	8	8	0	2	18
Total (N = 82)		37	41	1	3	82
Fraction		0.45122	0.5	0.0121951	0.0365854
S.E.		0.0549524	0.0552158	0.0121205	0.0207326
Fractions
	Expt tag	CC	NN	CN	NC
Rep 1 (N =17)	2027	0.47 ± 0.12	0.47 ± 0.12	0.00 ± 0.00	0.06 ± 0.06
Rep 2 (N = 22)	2100	0.41 ± 0.10	0.59 ± 0.10	0.00 ± 0.00	0.00 ± 0.00
Rep 3 (N = 25)	2119	0.48 ± 0.10	0.48 ± 0.10	0.04 ± 0.04	0.00 ± 0.00
Rep 4 (N = 18)	2132	0.44 ± 0.12	0.44 ± 0.12	0.00 ± 0.00	0.11 ± 0.07
Total (N = 82)		0.45 ± 0.05	0.50 ± 0.06	0.01 ± 0.01	0.04 ± 0.02

## Sheet: Rep 1 AOIs (2027) 
CC	NN	CN	NC
11	90		222
69	213
110	231
114	233
211	237
285	241
291	295
310	318
8	8	0	1

## Sheet: Rep 2 AOIs (2100)
CC	NN	CN	NC
19	22
80	53
88	73
93	125
115	166
162	180
186	208
221	217
269	219
	292
	312
	331
	341
9	13	0	0

## Sheet: Rep 3 AOIs (2119)
CC	NN	CN	NC
2	12	296
54	44
109	56
207	78
208	117
264	140
270	145
298	181
305	220
309	248
357	268
130	306
12	12	1	0

## Sheet: Rep 4 AOIs (2132)
CC	NN	CN	NC
54	88		180
111	102		229
118	103
136	130
152	146
180	160
194	182
201	183
8	8	0	2
