# Supplementary material for: A helicase-tethered ORC flip enables bidirectional helicase loading
Source: eLife journal article supplement (doi:10.7554/elife.74282), 2021-12-09
Supplement: supp [file elife-74282-supp-v1.zip › elife_poa_e74282_Figure_4_Source_data_1.xlsx]

## Sheet: Fig4d_data_for_histogram_N97
	AOI	OM-FRET #1 end - first Cdt1 release (s)	OM-FRET #2 end - second Cdt1 release (s)
Rep 1 082019_682	12	-1.199	-1.215
	16	-1.181	-3.656
	22	-3.573	NaN
	40	1.244	NaN
	48	-1.173	-6.064
	62	-1.176	1.228
	66	-1.193	-1.174
	93	NaN	1.205
	94	-1.178	NaN
	106	-1.175	-1.175
	131	-1.186	1.195
	158	1.19	1.213
	163	3.59	-1.206
	173	-1.174	-1.174
	209	1.202	-1.174
	213	-1.209	1.196
	229	-1.207	-3.614
	232	-6.059	-1.258
	252	-1.21	1.225
	272	NaN	1.213
	285	1.278	1.193
Rep 2 082719_720	3	1.19	NaN
	10	-1.18	NaN
	32	-1.193	3.664
	98	-1.189	-3.589
	101	-1.17	NaN
	112	1.223	1.202
	173	-1.27	1.189
	192	-1.171	1.218
	195	-1.175	1.24
	205	1.19	NaN
	215	-1.236	NaN
	219	NaN	-1.213
	222	-1.175	1.199
	265	1.193	1.261
Rep 3 051821_1724	2	1.227	NaN
	12	1.206	-3.65
	31	-1.184	1.191
	41	1.194	-1.173
	42	NaN	-1.217
	48	1.202	-1.178
	60	-1.176	NaN
	76	-1.173	-3.606
	80	-1.168	1.24
	82	1.19	1.195
	89	-1.284	1.201
	95	1.215	-1.22
	101	-1.205	-1.185
	105	-1.233	NaN
	127	-1.176	-1.226
	149	1.196	-1.201
	170	-1.205	1.191
	194	1.191	1.271
	205	NaN	1.201
	225	-3.57	1.246
	235	3.64	NaN
	252	-1.173	-1.171
