# Supplementary material for: A helicase-tethered ORC flip enables bidirectional helicase loading
Source: eLife journal article supplement (doi:10.7554/elife.74282), 2021-12-09
Supplement: supp [file elife-74282-supp-v1.zip › elife_poa_e74282_Figure_5_figure_supplement_1_source_data_1.xlsx]

## Sheet: Helicase_Rec_Load_Fig5_supp1
Quantification of Mcm5 band normalized to unlabeled protein control
Helicase Recruitment (ATPγS; low-salt wash)
	Repeat 1	Repeat 2	Mean	STD-dev
Unlabeled Control	1	1	1	0
Mcm2-73N-650/ORC6C-549	0.703997	0.55112	0.627558	0.0764384
Mcm2-73N-650/ORC6∆119, 6C-549	1.03806	0.777232	0.907646	0.130414
Helicase Loading (ATP; high-salt wash)
Unlabeled Control	1	1	1	0
Mcm2-73N-650/ORC6C-549	1.00569	0.932925	0.969307	0.0363818
Mcm2-73N-650/ORC6∆119, 6C-549	0.0523581	0.0844464	0.0684022	0.0160441
Mcm2-73N-650/ORC6C-549/Cdt1C-650	0.712548	0.696507	0.704528	0.00802014
