# Supplementary material for: A helicase-tethered ORC flip enables bidirectional helicase loading
Source: eLife journal article supplement (doi:10.7554/elife.74282), 2021-12-09
Supplement: supp [file elife-74282-supp-v1.zip › elife_poa_e74282_Figure_5_source_data_1.xlsx]

## Sheet: Fig5c_N94
	AOI	First Mcm2-7 arrival (frames)	MO FRET start (frames)	Second Mcm2-7 arrival (frames)	MO FRET end (frames)	ORC departure (frames)	First Mcm2-7 arrival (time; s)	MO FRET start (time; s)	Second Mcm2-7 arrival (time; s)	MO FRET end (time; s)	ORC departure (time; s)
081820_1350	12	126	162	166	169	334	302.221	387.681	398.558	404.564	801.169
	17	40	81	100	101	113	95.165	192.662	239.62	240.814	269.646
	19	218	241	296	296	328	523.669	577.768	710.863	709.678	786.641
	30	344	362	386	388	496	826.405	868.525	927.362	931.018	1190.88
	40	35	50	75	90	119	83.158	118.107	179.467	214.447	284.176
	45	473	503	528	529	546	1136.74	1207.65	1268.98	1270.22	1311.05
	55	8	17	22	44	52	18.094	38.603	51.789	103.635	122.96
	57	134	156	163	165	184	321.392	373.175	391.304	395.004	440.694
	86	274	310	316	320	361	658.048	743.342	759.018	767.36	866.117
	98	25	62	74	74	96	59.092	147.057	177.108	175.919	228.81
	107	70	77	91	96	157	167.474	183.055	217.999	228.81	375.645
	114	384	394	413	416	421	922.594	945.397	992.324	998.304	1010.35
	117	13	75	89	90	167	30.186	178.296	213.236	214.447	399.752
	125	127	137	246	252	329	304.612	327.344	590.943	604.198	789.053
	131	161	173	178	180	223	386.458	414.197	427.414	431.059	534.438
	135	139	222	225	228	255	333.384	532.059	540.456	546.484	611.311
	156	441	488	521	522	532	1059.6	1171.72	1252.19	1253.42	1277.42
	157	324	332	341	342	351	778.242	796.406	819.189	820.424	842.112
	162	430	442	449	452	526	1033.16	1060.83	1078.9	1084.99	1263.01
	170	180	217	273	289	297	432.25	520.058	655.686	692.841	712.097
	173	398	470	528	532	535	956.206	1128.32	1268.98	1277.42	1284.65
	191	1	4	15	15	40	1.183	7.249	34.935	33.764	93.995
	198	23	36	58	66	80	54.194	84.355	138.551	156.691	190.277
	204	106	114	152	153	164	254.017	272.042	364.725	365.961	392.543
	206	200	209	221	234	243	480.45	500.831	530.865	560.963	582.573
	223	84	113	131	145	170	201.165	269.646	314.175	346.602	406.958
	228	25	41	48	63	106	59.092	96.353	114.508	149.447	252.782
	238	84	104	115	118	146	201.165	248.035	275.722	281.768	349.107
	247	307	319	324	333	417	737.302	764.981	778.242	798.808	1000.8
	268	277	293	304	308	597	665.276	702.485	730.125	738.548	1434.18
	279	1	6	11	14	28	1.183	12.01	25.375	31.386	65.106
	299	130	179	210	210	255	311.788	428.641	504.449	503.275	611.311
	302	488	501	511	512	544	1172.93	1202.91	1228.11	1229.4	1306.27
	305	441	471	476	479	507	1059.6	1130.68	1143.95	1149.95	1217.26
090920_1399	16	165	169	191	200	216	395.841	404.191	458.597	479.013	517.528
	33	207	221	243	248	264	497.02	529.548	583.663	594.463	633.071
	37	291	355	388	389	441	699.04	851.759	932.5	933.706	1058.73
	48	439	449	457	459	473	1055.11	1078	1098.44	1102.01	1135.67
	49	119	127	134	137	139	285.087	303.166	321.173	327.19	332.065
	55	163	176	208	216	239	391.025	421.085	499.459	517.528	572.763
	56	387	406	416	417	444	930.044	974.555	999.868	1001.1	1066
	76	414	422	445	446	460	995.004	1013.11	1069.6	1070.8	1104.41
	102	70	89	95	97	127	167.369	211.788	227.389	230.972	303.166
	109	65	112	120	121	136	155.345	266.986	287.48	288.679	324.795
	113	62	127	132	154	179	148.21	303.166	316.368	368.155	428.367
	115	398	410	418	419	432	956.534	984.165	1004.64	1005.88	1037.08
	128	155	369	441	446	482	371.715	885.385	1059.93	1070.8	1157.3
	140	299	310	339	340	346	718.269	743.58	814.479	815.674	830.148
	149	33	63	64	68	87	78.523	149.413	152.966	161.411	207.021
	150	142	152	165	169	189	340.467	363.271	395.841	404.191	452.532
	153	386	439	443	443	600	927.652	1053.89	1064.78	1063.55	1441.25
	165	14	33	78	79	96	32.754	77.353	186.591	187.803	228.594
	180	200	241	242	247	327	480.194	577.537	581.206	592.09	784.355
	189	248	262	268	268	283	595.635	628.32	643.854	642.653	678.64
	194	186	259	281	281	291	446.521	621.071	675.069	673.897	697.866
	197	106	158	181	183	206	253.796	377.812	434.421	438.036	493.46
	198	406	429	498	498	510	975.729	1029.87	1196.98	1195.81	1224.75
	209	322	331	365	389	403	773.528	793.967	876.939	933.706	967.342
	227	340	348	349	349	361	816.881	834.938	838.547	837.352	866.142
	232	138	173	192	193	213	330.869	413.842	460.973	462.163	510.388
	238	223	228	236	238	263	535.575	546.405	566.702	570.397	630.687
090920_1405	11	140	148	156	161	193	335.391	353.47	373.989	384.845	462.033
	36	37	66	79	83	97	87.851	156.269	188.63	197.073	230.858
	83	307	311	322	325	347	737.651	746.088	773.827	779.797	832.803
	107	227	247	250	252	267	544.851	591.744	600.06	603.75	640.082
	108	418	437	549	550	595	1004.91	1049.51	1319.93	1321.14	1429.16
	109	472	484	500	501	568	1134.75	1162.32	1201.95	1203.17	1364.32
	111	457	472	520	522	533	1098.71	1133.56	1250.14	1253.75	1280.17
	130	34	52	84	85	105	80.666	122.64	200.652	201.903	250.108
	137	8	14	20	20	82	18.097	31.35	46.939	45.73	194.699
	154	117	123	128	131	175	280.066	293.28	306.516	312.473	418.616
	156	26	49	71	71	94	61.454	115.481	169.476	168.274	223.712
	167	442	470	474	484	496	1062.67	1128.72	1139.54	1162.32	1191.12
	196	248	275	282	283	345	595.272	659.342	677.402	678.618	827.968
	219	357	377	403	405	515	858.066	905.011	968.889	972.515	1236.79
	222	167	194	226	227	235	400.52	464.414	542.5	543.684	562.925
	225	351	360	406	409	431	843.604	864.126	976.125	982.087	1035.08
	228	521	531	543	545	591	1252.55	1275.33	1305.55	1309.14	1419.58
	243	190	203	205	214	270	455.999	485.997	492.03	512.54	647.325
	254	316	351	378	380	444	759.314	842.422	908.594	912.26	1066.34
	274	430	441	444	457	577	1033.85	1059.11	1067.53	1097.53	1385.97
	280	114	122	133	135	154	272.888	290.851	318.509	322.078	367.994
	291	402	429	473	483	492	966.512	1030.28	1137.13	1159.93	1181.56
	292	183	205	238	245	284	439.075	490.818	571.297	586.873	681.114
	302	199	227	236	237	248	477.574	543.684	566.476	567.705	594.109
	304	19	34	49	65	96	44.535	79.473	116.652	153.83	228.48
	319	110	123	132	165	183	263.264	293.28	316.105	394.478	437.894
	321	327	356	363	364	371	785.847	854.461	872.591	873.776	890.582
	328	182	201	228	233	244	436.696	481.245	547.338	558.194	584.473
	336	337	375	386	388	401	809.889	900.178	927.972	931.575	962.937
	342	39	48	74	80	96	92.704	113.089	176.63	189.882	228.48
	359	498	501	519	519	528	1197.14	1203.17	1247.74	1246.49	1268.13
	363	478	506	516	517	584	1149.12	1215.08	1240.42	1241.68	1402.72
	370	106	138	184	187	243	253.661	329.321	441.52	447.603	582.083

## Sheet: Fig5d_M1+10
	AOI	Frame	EFRET
s1405	11	141	-0.0855715
	11	142	0.275621
	11	143	-0.334382
	11	144	-0.752023
	36	38	-0.032281
	36	39	-0.073756
	36	40	0.0386436
	36	41	-0.1205
	83	308	-0.0374878
	83	309	-0.047544
	83	310	-0.0822885
	83	311	0.592809
	107	228	0.612435
	107	229	0.532011
	107	230	0.0316971
	107	231	0.407563
	108	419	-0.302203
	108	420	0.0285222
	108	421	-0.221923
	108	422	0.132079
	109	473	-0.169276
	109	474	-1.19802
	109	475	-0.0365631
	109	476	-1.42101
	111	458	0.111669
	111	459	-0.158046
	111	460	-0.774478
	111	461	-0.457897
	130	35	0.159141
	130	36	-0.141532
	130	37	-0.12213
	130	38	0.33577
	137	9	-1.01822
	137	10	-0.121896
	137	11	0.178227
	137	12	-0.0999298
	154	118	0.154876
	154	119	-0.166546
	154	120	0.288822
	154	121	-0.449143
	156	27	0.0559536
	156	28	-0.0152142
	156	29	0.270018
	156	30	0.208004
	167	443	0.244288
	167	444	-0.0824127
	167	445	-0.113132
	167	446	0.250892
	196	249	0.141018
	196	250	0.16138
	196	251	-0.464404
	196	252	-0.131138
	219	358	-0.0914688
	219	359	-0.211377
	219	360	0.126336
	219	361	0.36961
	222	168	-0.297172
	222	169	0.293013
	222	170	0.103611
	222	171	0.482648
	225	352	0.00473751
	225	353	0.0747018
	225	354	0.179552
	225	355	0.062318
	228	522	0.0425873
	228	523	0.314012
	228	524	0.228687
	228	525	0.0386286
	243	191	-0.0312877
	243	192	0.162373
	243	193	0.021813
	243	194	0.0429672
	254	317	-0.162558
	254	318	0.267937
	254	319	-0.0575766
	254	320	-0.150674
	274	431	-0.114951
	274	433	-0.400374
	274	434	0.141434
	280	115	-0.0852957
	280	116	0.0804623
	280	117	0.126787
	280	118	0.151732
	291	403	-0.0473163
	291	404	0.260294
	291	405	0.093687
	291	406	0.355787
	292	184	-0.236414
	292	185	0.0547214
	292	186	-0.163103
	292	187	0.201093
	302	200	0.135845
	302	201	0.333058
	302	202	0.183803
	302	203	1.10038
	304	20	0.0547142
	304	21	-0.355215
	304	22	-0.258379
	304	23	0.0888461
	319	111	-0.0514947
	319	112	0.109345
	319	113	0.257234
	319	114	0.292023
	321	328	0.00781045
	321	329	-0.00427152
	321	330	0.35325
	321	331	-0.862025
	328	183	-0.140999
	328	184	-0.683098
	328	185	0.281801
	328	186	0.13055
	336	338	-1.23831
	336	340	0.271395
	336	341	-1.22293
	342	40	0.436765
	342	41	0.321809
	342	42	0.129906
	342	43	-0.0270528
	359	499	0.0581084
	359	500	0.15033
	359	501	0.290158
	359	502	0.183393
	363	479	-0.573863
	363	480	0.126219
	363	481	0.373334
	363	482	0.218406
	370	107	0.433703
	370	108	0.137246
	370	109	-0.0254288
	370	110	0.265412
s1399	16	166	-0.438438
	16	167	-0.171443
	16	168	0.23917
	16	169	0.945562
	33	208	-0.208981
	33	209	0.0497089
	33	210	0.0760166
	33	211	-0.0477772
	37	292	0.0378305
	37	293	0.301502
	37	294	0.204679
	37	295	0.120186
	48	440	0.231688
	48	441	-0.0195936
	48	442	-0.0483624
	48	443	0.117018
	49	120	-0.073379
	49	121	-1.74051
	49	122	0.232693
	49	123	0.228526
	55	164	0.0580391
	55	165	0.0038552
	55	166	-0.114366
	55	167	0.126719
	56	388	0.199906
	56	389	0.262402
	56	390	-0.00386363
	56	391	0.0824283
	76	415	-1.51716
	76	416	0.053461
	76	417	-0.334783
	76	418	-0.0704715
	102	71	0.02426
	102	72	0.090329
	102	73	-0.00684009
	102	74	0.078362
	109	66	0.107442
	109	67	0.187592
	109	68	0.156642
	109	69	0.294128
	113	63	0.17924
	113	64	0.280574
	113	65	0.424061
	113	66	0.276549
	115	399	0.0911383
	115	400	0.162132
	115	401	-0.296856
	115	402	0.217445
	128	156	0.102939
	128	157	0.167412
	128	158	-1.15038
	128	159	-0.0885613
	140	300	0.311401
	140	301	-0.138995
	140	302	-0.0229545
	140	303	-0.0615738
	149	34	0.046188
	149	35	0.168069
	149	36	-0.489128
	149	37	0.213513
	150	143	-0.231438
	150	144	0.172777
	150	145	0.0646751
	150	146	0.135443
	153	387	0.199117
	153	388	0.123499
	153	389	0.245941
	153	390	-0.137221
	165	15	-0.385849
	165	16	0.447084
	165	17	0.283864
	165	18	-0.36559
	180	201	0.0714175
	180	202	0.130992
	180	203	0.2635
	180	204	0.170581
	189	249	-0.595406
	189	250	-0.0505516
	189	251	-0.0606022
	189	252	0.260378
	194	187	0.171645
	194	188	0.113647
	194	189	0.150988
	194	190	-0.0145314
	197	107	-0.105982
	197	108	0.0323797
	197	109	-0.0351264
	197	110	0.024425
	198	407	0.257052
	198	408	0.222279
	198	409	-0.0352218
	198	410	-0.168892
	209	323	0.18417
	209	324	0.127873
	209	325	0.305115
	209	326	0.133514
	227	341	-1.60775
	227	342	0.179835
	227	343	0.139318
	227	344	-0.556743
	232	139	0.280717
	232	140	-0.126973
	232	141	-0.00490888
	232	142	0.271463
	238	224	0.366372
	238	225	0.467693
	238	226	0.306303
	238	227	0.159508
s1350	12	127	0.745216
	12	128	-0.438502
	12	129	0.0958684
	12	130	0.0375811
	17	41	-0.159589
	17	42	-0.369212
	17	43	0.0527916
	17	44	0.0156917
	19	219	-0.0834919
	19	220	-1.04522
	19	221	-0.0969836
	19	222	0.071852
	30	345	0.0500881
	30	346	-0.149752
	30	347	0.303337
	30	348	0.0737937
	40	36	-0.0559037
	40	37	0.131231
	40	38	-0.115721
	40	39	0.0131751
	45	474	0.191751
	45	475	0.277751
	45	476	0.122463
	45	477	0.0533925
	55	9	-0.54489
	55	10	-0.207507
	55	11	0.122528
	55	12	-0.0949195
	57	135	0.0351264
	57	136	0.0479748
	57	137	-0.110027
	57	138	0.0937292
	86	275	0.0850398
	86	276	0.260251
	86	277	0.274809
	86	278	0.193088
	98	26	0.218451
	98	27	-0.0372129
	98	28	-0.447917
	98	29	0.138722
	107	71	0.25815
	107	72	0.0324311
	107	73	0.139953
	107	74	0.0623398
	114	385	-0.0923024
	114	386	-0.0227881
	114	387	-1.39852
	114	388	0.1113
	117	14	0.350485
	117	15	0.081785
	117	16	0.244309
	117	17	0.0490326
	125	128	0.146949
	125	129	0.046957
	125	130	0.0654277
	125	131	0.26037
	131	162	0.0208862
	131	163	0.232253
	131	164	-0.261298
	131	165	0.0367804
	135	140	0.0459679
	135	141	-0.122979
	135	142	0.0343868
	135	143	0.216682
	156	442	0.0482251
	156	443	0.153515
	156	444	0.0808157
	156	445	0.247809
	157	325	0.115051
	157	326	0.221505
	157	327	0.139401
	157	328	-0.0233532
	162	431	0.292058
	162	432	0.25392
	162	433	-0.0769461
	162	434	0.00327647
	170	181	-0.70808
	170	182	0.160538
	170	183	0.138332
	170	184	0.415576
	173	399	0.179934
	173	400	0.251918
	173	401	-0.0556936
	173	402	0.175632
	191	2	0.0416652
	191	3	0.074455
	191	4	0.693922
	191	5	0.599973
	198	24	0.0793358
	198	25	0.120955
	198	26	0.294081
	198	27	0.116911
	204	107	0.368168
	204	108	-1.19219
	204	109	0.393001
	204	110	0.275226
	206	201	-0.0523639
	206	202	0.00417071
	206	203	0.270667
	206	204	0.239888
	223	85	0.260193
	223	86	0.213752
	223	87	-0.0244846
	223	88	0.229679
	228	26	0.113955
	228	27	0.0135065
	228	28	-0.115612
	228	29	0.0119048
	238	85	0.0778213
	238	86	0.528599
	238	87	0.257829
	238	88	0.051805
	247	308	-0.00496296
	247	309	-0.360289
	247	310	0.461325
	247	311	-1.59018
	268	278	0.0970669
	268	279	0.189124
	268	280	-0.239694
	268	281	-0.0742501
	279	2	-0.501075
	279	3	0.10251
	279	4	0.08236
	279	5	-0.0902387
	299	131	-0.4873
	299	132	-0.170791
	299	133	0.244691
	299	134	0.11854
	302	489	0.320296
	302	490	0.356524
	302	491	-0.0820372
	302	492	-0.0227469
	305	443	0.705962
	305	444	-0.741737
			0.0165111
			0.358583
			0.0185917

## Sheet: Fig5d_M2-10
	AOI	Frame	EFRET
s1405	11	153	0.906578
	11	154	1.06415
	11	155	0.851667
	11	156	0.99534
	36	76	0.836297
	36	77	0.656061
	36	78	0.625272
	36	79	0.630722
	83	319	0.888518
	83	320	0.811605
	83	321	0.836484
	83	322	0.684301
	107	247	1.01198
	107	248	0.949416
	107	249	0.62134
	107	250	0.734183
	108	546	0.494974
	108	547	0.737492
	108	548	0.449039
	108	549	0.609194
	109	497	1.20737
	109	498	0.866572
	109	499	0.855139
	109	500	1.25866
	111	517	0.870748
	111	518	0.6639
	111	519	0.86188
	111	520	0.672573
	130	81	0.590411
	130	82	0.821046
	130	83	0.722106
	130	84	0.804352
	137	17	0.750271
	137	18	1.10142
	137	19	0.884483
	137	20	0.686541
	154	125	0.735953
	154	126	0.822368
	154	127	1.042
	154	128	0.902864
	156	68	0.769819
	156	69	0.922055
	156	70	0.70094
	156	71	0.584899
	167	471	0.283759
	167	472	0.493096
	167	473	0.320319
	167	474	0.889877
	196	279	0.785596
	196	280	0.988076
	196	281	0.889932
	196	282	0.886139
	219	400	0.906494
	219	401	0.541085
	219	402	0.887034
	219	403	0.738245
	222	223	0.793285
	222	224	0.710436
	222	225	0.909944
	222	226	0.771167
	225	403	0.523489
	225	404	0.947767
	225	405	0.763153
	225	406	0.890766
	228	540	0.181359
	228	541	0.578724
	228	542	0.448463
	228	543	0.686329
	243	202	0.0142243
	243	203	0.824293
	243	204	0.693146
	243	205	0.475577
	254	375	0.848604
	254	376	0.9736
	254	377	0.775901
	254	378	0.864789
	274	441	0.828305
	274	442	0.724327
	274	443	0.381086
	274	444	1.09109
	280	130	0.557282
	280	131	0.550313
	280	132	0.568978
	280	133	0.444486
	291	470	0.732469
	291	471	0.656232
	291	472	0.941809
	291	473	0.840146
	292	235	0.770648
	292	236	0.799896
	292	237	0.996157
	292	238	0.710065
	302	233	0.701096
	302	234	0.877151
	302	235	0.864437
	302	236	0.720299
	304	46	0.925678
	304	47	0.790572
	304	48	0.776729
	304	49	0.776457
	319	129	0.766054
	319	130	0.916333
	319	131	0.589678
	319	132	0.942696
	321	360	0.63783
	321	361	0.51085
	321	362	0.843397
	321	363	0.884194
	328	225	0.622139
	328	226	0.760409
	328	227	0.783625
	328	228	0.806917
	336	383	0.75893
	336	384	0.705817
	336	385	0.914952
	336	386	0.730548
	342	71	0.739884
	342	72	0.604497
	342	73	0.32724
	342	74	0.54572
	359	516	0.295542
	359	517	0.733862
	359	518	0.779617
	359	519	0.215363
	363	513	0.426815
	363	514	0.707171
	363	515	0.676984
	363	516	0.442777
	370	181	1.10469
	370	182	0.96364
	370	183	0.823297
	370	184	0.657943
s1399	16	188	0.409818
	16	189	0.558187
	16	190	0.705647
	16	191	0.705469
	33	240	0.367726
	33	241	0.639912
	33	242	0.618838
	33	243	0.567436
	37	385	0.801433
	37	386	0.755814
	37	387	0.937399
	37	388	0.667271
	48	454	0.848973
	48	455	0.791134
	48	456	0.673055
	48	457	0.773569
	49	131	0.866226
	49	132	0.722114
	49	133	0.691056
	49	134	0.772737
	55	205	0.738468
	55	206	0.658574
	55	207	0.992547
	55	208	0.615422
	56	413	0.950928
	56	414	1.11421
	56	415	1.0659
	56	416	0.787904
	76	442	0.635298
	76	443	0.704342
	76	444	0.630215
	76	445	0.735561
	102	92	0.673076
	102	93	0.72145
	102	94	0.567557
	102	95	0.551569
	109	117	0.704702
	109	118	0.643693
	109	119	0.640135
	109	120	0.570401
	113	129	0.888322
	113	130	0.820265
	113	131	1.73032
	113	132	0.840259
	115	415	0.753282
	115	416	0.586957
	115	417	0.585681
	115	418	0.623536
	128	438	0.847324
	128	439	0.839398
	128	440	0.65294
	128	441	0.755769
	140	336	0.783026
	140	337	0.92053
	140	338	0.677605
	140	339	0.747914
	149	61	0.0325536
	149	62	0.113831
	149	63	0.594437
	149	64	0.503044
	150	162	0.803675
	150	163	0.626744
	150	164	0.691189
	150	165	0.706014
	153	440	0.600747
	153	441	0.695491
	153	442	0.601812
	153	443	0.374672
	165	75	0.76959
	165	76	0.937946
	165	77	0.71575
	165	78	0.672626
	180	239	-0.253767
	180	240	0.182375
	180	241	0.756027
	180	242	0.73346
	189	265	0.642024
	189	266	0.602226
	189	267	0.603787
	189	268	0.582836
	194	278	0.815212
	194	279	0.786751
	194	280	0.944412
	194	281	0.928124
	197	178	0.776679
	197	179	0.727194
	197	180	0.817486
	197	181	0.803111
	198	495	0.678617
	198	496	0.814075
	198	497	0.427499
	198	498	0.928062
	209	362	0.747685
	209	363	0.598567
	209	364	0.836447
	209	365	0.741162
	227	346	0.124411
	227	347	0.161996
	227	348	0.700035
	227	349	0.960136
	232	189	0.791446
	232	190	0.603282
	232	191	0.596187
	232	192	0.964252
	238	233	0.769269
	238	234	0.868778
	238	235	0.706203
	238	236	0.73525
s1350	12	163	0.604051
	12	164	1.5777
	12	165	0.900266
	12	166	0.7972
	17	97	0.523705
	17	98	0.539427
	17	99	0.611911
	17	100	0.542223
	19	293	1.54915
	19	294	0.900546
	19	295	0.875001
	19	296	0.410658
	30	383	0.754542
	30	384	0.534786
	30	385	0.94386
	30	386	0.567235
	40	72	0.841901
	40	73	0.925343
	40	74	0.863742
	40	75	0.712531
	45	525	0.619152
	45	526	0.660699
	45	527	0.705839
	45	528	0.634224
	55	19	0.528183
	55	20	0.697574
	55	21	0.610625
	55	22	0.849659
	57	160	0.548275
	57	161	0.638763
	57	162	0.705082
	57	163	0.683055
	86	313	0.721817
	86	314	0.694304
	86	315	0.803559
	86	316	0.675149
	98	71	0.43481
	98	72	0.65246
	98	73	0.567604
	98	74	1.04427
	107	88	0.715312
	107	89	0.815107
	107	90	0.75124
	107	91	0.834667
	114	410	0.748408
	114	411	0.704931
	114	412	0.902903
	114	413	0.767265
	117	86	0.624694
	117	87	0.99758
	117	88	0.905102
	117	89	0.714818
	125	243	0.346319
	125	244	1.2247
	125	245	1.04821
	125	246	0.90178
	131	175	0.858061
	131	176	0.56145
	131	177	0.910593
	131	178	0.857355
	135	222	0.35954
	135	223	0.537528
	135	224	0.698805
	135	225	0.877505
	156	518	0.585261
	156	519	0.513058
	156	520	0.707605
	156	521	0.850069
	157	338	0.272335
	157	339	0.875803
	157	340	1.2727
	157	341	0.767982
	162	446	0.600786
	162	447	0.335396
	162	448	0.72549
	162	449	0.972192
	170	270	0.728633
	170	271	0.542487
	170	272	1.05529
	170	273	0.805512
	173	525	0.893591
	173	526	1.15146
	173	527	0.773618
	173	528	0.74983
	191	12	0.56371
	191	13	0.623329
	191	14	0.703951
	191	15	0.551246
	198	55	0.689794
	198	56	0.815922
	198	57	0.663544
	198	58	0.702762
	204	149	-0.178586
	204	150	0.639688
	204	151	0.851559
	204	152	0.70884
	206	218	0.494194
	206	219	0.537773
	206	220	0.58526
	206	221	0.748417
	223	128	0.63316
	223	129	0.614783
	223	130	0.64963
	223	131	0.749749
	228	45	0.412186
	228	46	0.529367
	228	47	0.778341
	228	48	1.011
	238	112	0.808513
	238	113	0.573356
	238	114	0.819543
	238	115	0.710762
	247	321	0.974216
	247	322	0.345641
	247	323	1.78806
	247	324	0.868942
	268	301	0.725382
	268	302	0.64997
	268	303	0.610549
	268	304	0.649927
	279	8	0.963527
	279	9	0.500962
	279	10	0.968745
	279	11	0.605761
	299	207	1.58054
	299	208	1.18354
	299	209	0.518166
	299	210	0.477437
	302	508	1.11724
	302	509	0.288318
	302	510	0.667694
	302	511	1.31662
	305	473	0.934911
	305	474	0.905088
	305	475	1.19837
	305	476	1.28711
			0.733259
			0.235445
			0.0121422

## Sheet: Fig5d_M2+10
	AOI	Frame	EFRET
s1405	11	157	0.612971
	11	158	1.06946
	11	159	0.645747
	11	160	0.541435
	36	80	0.741641
	36	81	0.666825
	36	82	0.609451
	36	83	0.375933
	83	323	0.831013
	83	324	0.514937
	83	325	0.441506
	83	326	0.0958465
	107	251	1.22264
	107	252	0.814913
	107	253	0.0115297
	107	254	-0.0477446
	108	550	0.597438
	108	551	0.209048
	108	552	0.177455
	108	553	0.145742
	109	501	0.555488
	109	502	-0.468154
	109	503	0.0543479
	109	504	-0.045548
	111	521	0.893901
	111	522	0.225296
	111	523	-0.498774
	111	524	-0.710619
	130	85	0.501938
	130	86	0.122566
	130	87	0.094806
	130	88	0.138624
	137	21	0.169537
	137	22	0.180534
	137	24	-0.141297
	154	129	0.850528
	154	130	0.344727
	154	131	0.585339
	154	132	0.1336
	156	72	0.173164
	156	73	-0.0737957
	156	74	-0.0289831
	156	75	0.251498
	167	475	0.723156
	167	476	0.943966
	167	477	0.486693
	167	478	0.664872
	196	283	0.811404
	196	284	-0.162069
	196	285	-0.0268864
	196	286	0.0949511
	219	404	1.01705
	219	405	0.985553
	219	406	0.176254
	219	407	0.146863
	222	227	0.417018
	222	228	-0.800834
	222	229	-0.0237572
	222	230	-0.863802
	225	407	0.722463
	225	408	0.785689
	225	409	0.76217
	225	410	0.00714448
	228	544	0.638149
	228	545	0.641277
	228	546	0.330017
	228	547	0.0842982
	243	206	0.777325
	243	207	0.862779
	243	208	0.760378
	243	209	0.94237
	254	379	0.944905
	254	380	0.84653
	254	381	0.0650092
	254	382	0.214848
	274	445	1.22804
	274	446	1.08761
	274	447	1.48735
	274	448	0.864431
	280	134	0.383173
	280	135	0.462167
	280	136	0.107565
	280	137	0.23534
	291	474	0.934528
	291	475	0.836537
	291	476	0.773672
	291	477	0.704295
	292	239	0.721888
	292	240	0.721871
	292	241	0.596895
	292	242	0.911936
	302	237	0.660234
	302	238	0.0645465
	302	239	0.0939004
	302	240	0.263771
	304	50	0.742334
	304	51	0.700587
	304	52	0.899119
	304	53	0.733307
	319	133	0.902876
	319	134	1.01088
	319	135	1.03742
	319	136	0.897306
	321	364	0.605599
	321	365	-0.044866
	321	366	0.40132
	321	367	0.186924
	328	229	0.651613
	328	230	0.660181
	328	231	0.579905
	328	232	0.805935
	336	387	0.972952
	336	388	0.526719
	336	389	0.30357
	336	390	0.305749
	342	75	0.637862
	342	76	0.818812
	342	77	0.727622
	342	78	0.68293
	359	520	-0.23181
	359	521	-0.0691899
	359	522	-0.0393443
	359	523	0.273471
	363	517	0.385439
	363	518	0.0679867
	363	519	-0.063734
	363	520	0.0159284
	370	185	0.205671
	370	186	1.57172
	370	187	0.566705
	370	188	-1.93523
s1399	16	192	0.680168
	16	193	0.622498
	16	194	0.735689
	16	195	0.876275
	33	244	0.49587
	33	245	0.545716
	33	246	0.611262
	33	247	0.804519
	37	389	0.638419
	37	390	0.261546
	37	391	0.291504
	37	392	0.383483
	48	458	0.79212
	48	459	0.756301
	48	460	0.161698
	48	461	-0.175953
	49	135	0.730435
	49	136	0.734608
	49	137	0.768991
	49	138	0.142057
	55	209	0.680368
	55	210	0.667748
	55	211	0.708732
	55	212	0.705134
	56	417	0.605114
	56	418	-0.0122919
	56	419	-1.19404
	56	420	-0.0754255
	76	446	0.349988
	76	447	-0.0578365
	76	448	-0.021779
	76	449	0.298778
	102	96	0.589371
	102	97	0.372782
	102	98	0.213482
	102	99	0.242879
	109	121	0.838081
	109	122	0.111934
	109	123	0.310101
	109	124	0.255686
	113	133	1.02933
	113	134	0.887196
	113	135	0.14294
	113	136	1.14357
	115	419	0.707782
	115	420	0.217937
	115	421	0.161141
	115	422	0.0556644
	128	442	0.544414
	128	443	0.646153
	128	444	0.702603
	128	445	0.612954
	140	340	0.594545
	140	341	-0.0686375
	140	342	0.157792
	140	343	0.267483
	149	65	0.65262
	149	66	0.638459
	149	67	0.620449
	149	68	0.737629
	150	166	0.827274
	150	167	0.676778
	150	168	0.62077
	150	169	0.669589
	153	444	0.198853
	153	445	0.186956
	153	446	0.0406731
	153	447	0.191757
	165	79	0.69027
	165	80	0.190488
	165	81	-0.12635
	165	82	0.0144957
	180	243	0.608726
	180	244	0.594285
	180	245	0.493883
	180	246	0.50907
	189	269	0.210462
	189	270	0.203529
	189	271	0.288046
	189	272	0.00901469
	194	282	-0.0661748
	194	283	0.0252028
	194	284	0.105032
	194	285	0.324938
	197	182	0.816373
	197	183	0.68777
	197	184	0.272289
	197	185	0.267404
	198	499	0.106477
	198	500	0.238456
	198	501	0.206015
	198	502	0.204106
	209	366	0.812088
	209	367	0.62729
	209	368	0.629493
	209	369	0.76471
	227	350	0.0886706
	227	351	0.45334
	227	352	-0.289986
	227	353	-0.928143
	232	193	0.660979
	232	194	0.503406
	232	195	0.0125701
	232	196	0.216508
	238	237	0.736372
	238	238	0.551345
	238	239	0.255785
	238	240	-0.00510347
s1350	12	167	0.911494
	12	168	0.657764
	12	169	0.606561
	12	170	0.333106
	17	101	0.566245
	17	102	0.0921758
	17	103	0.0554613
	17	104	0.0206413
	19	299	0.381918
	19	300	0.0251304
	30	387	0.200272
	30	388	0.53989
	30	389	-0.283449
	30	390	-0.189154
	40	76	0.734141
	40	77	0.639133
	40	78	0.627155
	40	79	0.659989
	45	529	0.33765
	45	530	-0.0381945
	45	531	0.0201288
	45	532	-0.0662228
	55	23	1.0314
	55	24	1.03739
	55	25	0.560512
	55	26	0.663308
	57	164	0.164939
	57	165	0.380905
	57	166	-0.0373479
	57	167	0.248357
	86	317	0.735896
	86	318	0.772724
	86	319	0.714618
	86	320	0.813509
	98	75	-0.129827
	98	76	-0.300988
	98	77	0.307343
	98	78	0.132317
	107	92	0.729115
	107	93	0.973781
	107	94	0.877946
	107	95	0.72288
	114	414	0.787348
	114	415	0.363098
	114	416	0.158972
	114	417	0.0446368
	117	90	0.776101
	117	91	-0.40608
	117	92	-0.37925
	117	93	0.113515
	125	247	0.622579
	125	248	0.93555
	125	249	1.46228
	125	250	1.19342
	131	179	0.0834406
	131	180	0.432517
	131	181	0.239039
	131	182	-0.477618
	135	226	0.480204
	135	227	0.732638
	135	228	0.621353
	135	229	0.0459052
	156	522	0.851911
	156	523	0.0320486
	156	524	0.226652
	156	525	0.274011
	157	342	0.464045
	157	343	-0.152641
	157	344	0.00885772
	157	345	0.245211
	162	450	1.14646
	162	451	1.06414
	162	452	0.726548
	162	453	0.00791761
	170	274	0.686431
	170	275	0.923346
	170	276	0.657804
	170	277	0.888756
	173	529	0.854703
	173	530	0.651057
	173	531	0.553073
	173	532	0.340436
	191	16	0.0272145
	191	17	-0.325197
	191	18	0.289797
	191	19	0.194532
	198	59	0.797139
	198	60	0.592026
	198	61	0.60062
	198	62	0.692193
	204	153	0.581486
	204	154	-0.0548717
	204	155	-0.0128513
	204	156	0.157436
	206	222	0.729379
	206	223	0.554059
	206	224	0.623808
	206	225	0.713329
	223	132	0.504734
	223	133	0.679271
	223	134	0.639604
	223	135	0.627878
	228	49	0.856839
	228	50	0.609815
	228	51	0.689444
	228	52	0.660256
	238	116	0.724919
	238	117	0.542369
	238	118	0.644863
	238	119	-0.191562
	247	325	1.90328
	247	326	0.844972
	247	327	0.936138
	247	328	1.33212
	268	305	0.670827
	268	306	0.674023
	268	307	0.731156
	268	308	0.248933
	279	12	0.584304
	279	13	0.592613
	279	14	0.428686
	279	15	0.0766753
	299	211	-0.0672663
	299	212	0.226398
	299	213	-0.264657
	299	214	0.23585
	302	512	0.268913
	302	513	-0.903066
	302	514	0.227736
	302	515	-0.0179359
	305	477	0.759962
	305	479	0.880451
	305	480	-0.287255
			0.425303
			0.430602
			0.0223257

## Sheet: Figure 5e-f bar graphs 
	WT	∆119	ORC pre-bound
Fraction 2nd Mcm2-7 Recruitment	0.184295	0.0191388	0.26
	(115/624)	(8/418)	(10/39)
SE	0.0155214	0.00670151	0.07
	WT	∆119	ORC pre-bound
Fraction MO FRET	0.232372	0.0119617	0.36
	(145/624)	(5/418)	(14/39)
SE	0.0169073	0.00531735	0.08
