# Supplementary material for: A helicase-tethered ORC flip enables bidirectional helicase loading
Source: eLife journal article supplement (doi:10.7554/elife.74282), 2021-12-09
Supplement: supp [file elife-74282-supp-v1.zip › elife_poa_e74282_Figure_6_source_data_1.xlsx]

## Sheet: Cdt1 release_MO-FRET (N = 78)
File	AOI	First Cdt1 release (time; s)	MO-FRET start (time; s)	MO-FRET start after first Cdt1 release (s)
Rep 1 120820_1591	3	962.386	963.595	1.209
	5	362.686	366.381	3.695
	20	514.555	518.139	3.584
	46	969.617	973.223	3.606
	51	1073.17	1076.84	3.672
	98	935.901	946.764	10.863
	147	887.663	891.34	3.677
	152	34.961	38.54	3.579
	164	340.991	344.632	3.641
	172	109.737	132.554	22.817
	174	808.181	811.773	3.592
	204	788.861	799.776	10.915
	215	639.625	638.427	-1.198
	216	1102.05	1105.63	3.578
	218	947.945	1055.1	107.159
	245	353	356.728	3.728
	260	1027.4	1028.61	1.2
	300	690.157	693.743	3.586
	302	275.993	289.308	13.315
	334	731.074	725.111	-5.963
	337	584.218	587.937	3.719
Rep 2 120820_1597	7	705.746	711.721	5.975
	13	511.167	514.73	3.563
	21	229.863	245.491	15.628
	32	729.729	733.325	3.596
	72	246.718	247.975	1.257
	73	696.121	699.721	3.6
	110	188.91	192.51	3.6
	118	1013.79	1017.4	3.609
	122	109.444	113.106	3.662
	129	679.347	680.556	1.209
	153	294.688	298.287	3.599
	155	1163.08	1164.31	1.234
	177	227.454	231.053	3.599
	179	684.117	692.565	8.448
	181	633.556	634.747	1.191
	192	814.19	817.782	3.592
	200	679.347	682.924	3.577
	210	626.285	629.944	3.659
	240	78.141	76.963	-1.178
	247	1088.39	1089.61	1.224
	248	1218.31	1298.88	80.571
	262	306.612	317.43	10.818
	271	1179.91	1166.72	-13.192
	273	383.452	382.244	-1.208
	297	176.908	190.112	13.204
	298	607.155	610.739	3.584
	304	564.04	567.599	3.559
	310	1266.5	1270.09	3.591
	314	898.278	901.856	3.578
	319	862.244	868.33	6.086
	345	95.033	98.608	3.575
	348	378.606	384.65	6.044
Rep 3 122220_1695	20	1209.2	1232.06	22.858
	47	927.357	933.401	6.044
	51	766.304	769.905	3.601
	80	688.898	690.102	1.204
	105	1175.42	1179.01	3.591
	163	141.136	144.738	3.602
	186	640.703	644.327	3.624
	204	766.304	854.125	87.821
	218	459.852	463.466	3.614
	233	512.954	523.839	10.885
	256	240.106	258.214	18.108
Rep 4 122220_1701	41	119.657	123.331	3.674
	78	138.978	142.607	3.629
	103	843.182	844.376	1.194
	142	763.404	776.764	13.36
Rep 5 122220_1707	36	418.296	417.076	-1.22
	47	1013.18	1038.54	25.361
	53	230.554	238.968	8.414
	61	936.166	942.141	5.975
	76	827.797	829.012	1.215
	177	892.798	893.994	1.196
	218	572.434	573.622	1.188
	222	319.682	320.89	1.208
	242	25.505	29.076	3.571
	252	885.583	898.814	13.231
				8.27918	Average
				2.01919	SEM
